# Supplementary material for: Multifunctional carbon nanomateriels for camptothecine low-water soluble anticancer drug delivery
Source: Royal Society of Chemistry journal article supplement (doi:10.1039/c7nj04609j), 2017-12-11
Supplement: c7nj04609j1.pdf [file c7nj04609j1.pdf]

## Multifunctional Carbon nanomaterials for Camptothecine Low-water Soluble Anticancer Drug Delivery

### Supporting informations

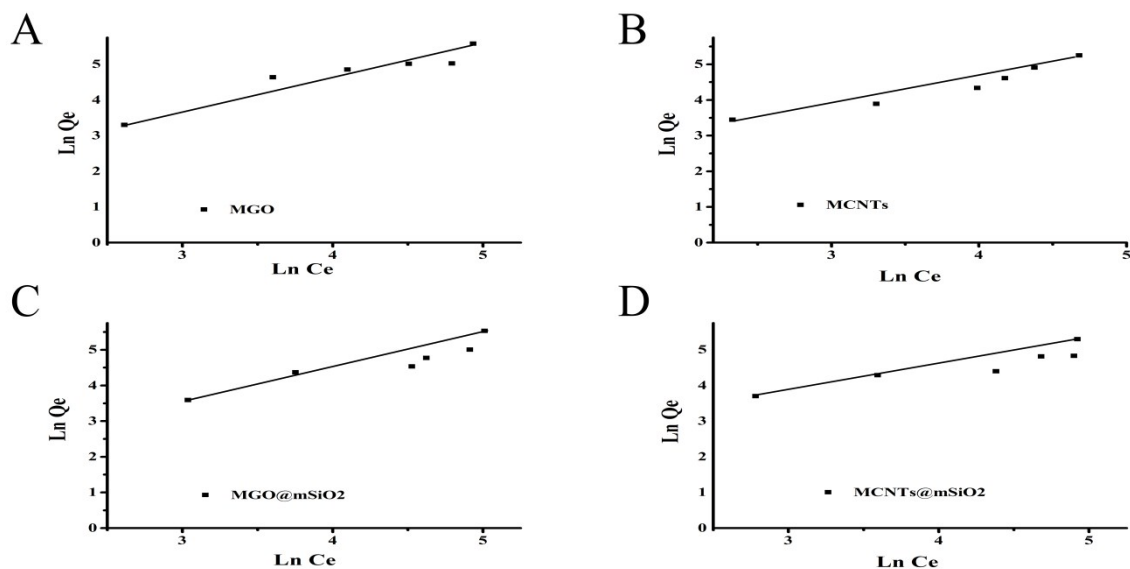

Fig. S1: Freundlich Isotherm model for CPT adsorption onto: A) MGO, B) MCNTs, C) MGO@mSiO<sub>2</sub>, D) MCNTs@mSiO<sub>2</sub>.

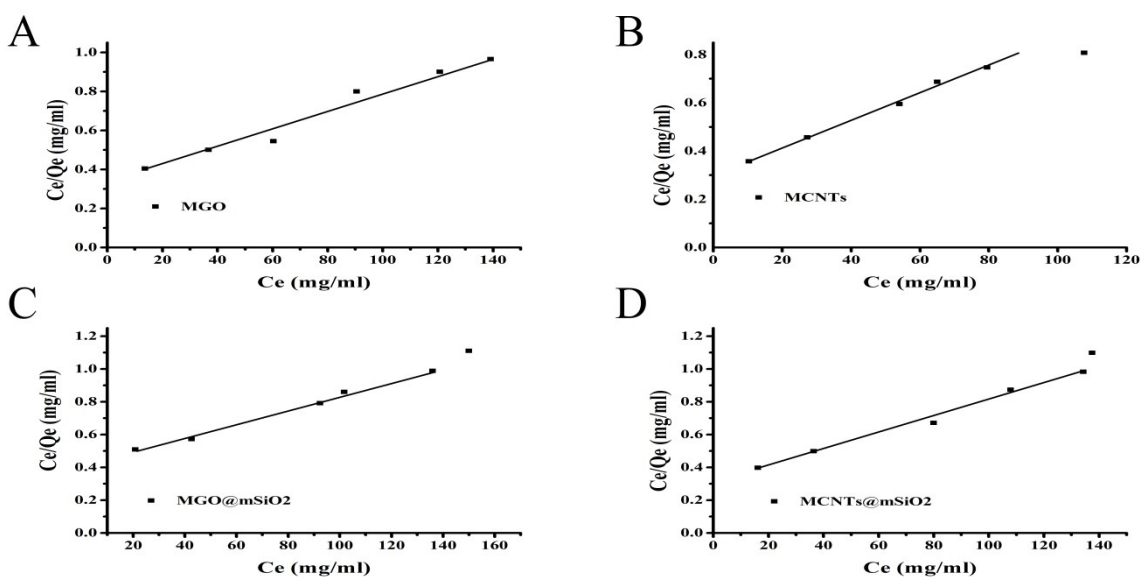

Fig. S2: Langmuir Isotherm model for CPT adsorption onto: A) MGO, B) MCNTs, C) MGO@mSiO<sub>2</sub>, D) MCNTs@mSiO<sub>2</sub>.

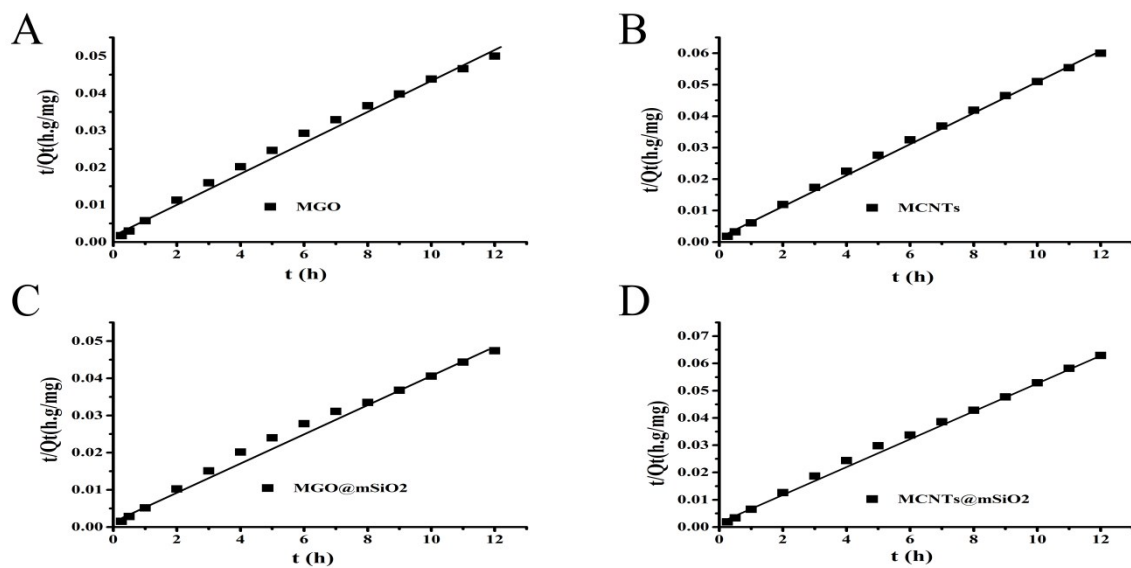

**Fig. S3: Pseudo second-order Kinetic plots for CPT adsorption onto: A) MGO, B) MCNTs, C) MGO@mSiO<sub>2</sub>, D) MCNTs@mSiO<sub>2</sub>.**
